# Supplementary material for: The Tyrosine Phosphatase PRL Regulates Attachment of Toxoplasma gondii to Host Cells and Is Essential for Virulence
Source: PubMed Central journal article supplement (PMC9241511; doi:10.1128/msphere.00052-22), 2022-05-23
Supplement: msphere.00052-22-sd001.pdf [file msphere.00052-22-sd001.pdf]

| ID            | Annotation                                                   | Fold Change | Control (Δku80) | Δpri.cp |
|---------------|--------------------------------------------------------------|-------------|-----------------|---------|
| TGGT1_208718  | putative protein tyrosine phosphatase type IVA A             | INF         | 0               | 54      |
| TGGT1_287980  | FHA domain-containing protein                                | INF         | 0               | 17      |
| TGGT1_202840  | FHA domain-containing protein                                | INF         | 0               | 12      |
| TGGT1_262150  | kelch repeat and K+ channel tetramerisation domain containin | INF         | 0               | 11      |
| TGGT1_278660  | putative P-type ATPase4                                      | INF         | 0               | 9       |
| TGGT1_211350  | CBS domain-containing protein                                | INF         | 0               | 8       |
| TGGT1_297520  | proteophosphoglycan PPG1                                     | INF         | 0               | 8       |
| TGGT1_219700  | putative DNA replication licensing factor MCM4               | INF         | 0               | 6       |
| TGGT1_227800  | EF hand domain-containing protein                            | INF         | 0               | 6       |
| TGGT1_243920  | putative DNA replication licensing factor MCM5               | INF         | 0               | 6       |
| TGGT1_263130  | putative citrate synthase                                    | INF         | 0               | 6       |
| TGGT1_289970  | hypothetical protein                                         | INF         | 0               | 5       |
| TGGT1_311830  | hypothetical protein                                         | INF         | 0               | 5       |
| TGGT1_204310  | hypothetical protein                                         | INF         | 0               | 4       |
| TGGT1_229650  | josephin protein                                             | INF         | 0               | 4       |
| TGGT1_235490  | hypothetical protein                                         | INF         | 0               | 4       |
| TGGT1_242800  | putative ribosome biogenesis protein NSA2                    | INF         | 0               | 4       |
| TGGT1_300060  | signal peptidase subunit protein                             | INF         | 0               | 4       |
| TGGT1_208590  | putative vacuolar ATP synthase subunit 54kD                  | INF         | 0               | 3       |
| TGGT1_214970  | putative DNA replication licensing factor                    | INF         | 0               | 3       |
| TGGT1_224130  | hypothetical protein                                         | INF         | 0               | 3       |
| TGGT1_238040A | protein disulfide-isomerase domain-containing protein        | INF         | 0               | 3       |
| TGGT1_252430  | hypothetical protein                                         | INF         | 0               | 3       |
| TGGT1_253440  | putative cell-cycle-associated protein kinase SRPK           | INF         | 0               | 3       |
| TGGT1_255320  | mRNA turnover 4 (MRT4) family protein                        | INF         | 0               | 3       |
| TGGT1_262710  | Ctr copper transporter family protein                        | INF         | 0               | 3       |
| TGGT1_272600  | adaptin c-terminal domain-containing protein                 | INF         | 0               | 3       |
| TGGT1_293860  | hypothetical protein                                         | INF         | 0               | 3       |
| TGGT1_294640  | ribonucleoside-diphosphate reductase large chain             | INF         | 0               | 3       |
| TGGT1_297940  | single-strand binding protein                                | INF         | 0               | 3       |
| TGGT1_299780  | hypothetical protein                                         | INF         | 0               | 3       |
| TGGT1_203370  | hypothetical protein                                         | INF         | 0               | 2       |
| TGGT1_209210  | hypothetical protein                                         | INF         | 0               | 2       |
| TGGT1_213770  | putative Superkiller viralicidic activity 2 family 2         | INF         | 0               | 2       |
| TGGT1_214180  | ENTH domain-containing protein                               | INF         | 0               | 2       |
| TGGT1_216730  | MCM2/3/5 family protein                                      | INF         | 0               | 2       |
| TGGT1_216810  | 5'-nucleotidase, C-terminal domain-containing protein        | INF         | 0               | 2       |
| TGGT1_223680  | ubiquitin family protein                                     | INF         | 0               | 2       |
| TGGT1_226580  | hypothetical protein                                         | INF         | 0               | 2       |
| TGGT1_227650  | putative microtubule-associated protein RP/EB family         | INF         | 0               | 2       |
| TGGT1_227970  | histone family DNA-binding protein                           | INF         | 0               | 2       |
| TGGT1_233000  | KOW motif domain-containing protein                          | INF         | 0               | 2       |
| TGGT1_237220  | putative DNA replication licensing factor Mcm7               | INF         | 0               | 2       |
| TGGT1_239790  | BRCA1 C Terminus (BRCT) domain-containing protein            | INF         | 0               | 2       |
| TGGT1_245470  | mitotic checkpoint protein, BUB3 family protein              | INF         | 0               | 2       |
| TGGT1_245490  | microneme protein MIC8                                       | INF         | 0               | 2       |
| TGGT1_248890  | actin-like protein ALP3b                                     | INF         | 0               | 2       |
| TGGT1_249610  | hypothetical protein                                         | INF         | 0               | 2       |
| TGGT1_259260  | membrane protein FtsH1                                       | INF         | 0               | 2       |
| TGGT1_261000  | MutS domain V domain-containing protein                      | INF         | 0               | 2       |
| TGGT1_263750  | hypothetical protein                                         | INF         | 0               | 2       |
| TGGT1_264770  | hypothetical protein                                         | INF         | 0               | 2       |
| TGGT1_269180  | MIF4G domain-containing protein                              | INF         | 0               | 2       |
| TGGT1_270780  | DNA-directed RNA polymerase II RPB6                          | INF         | 0               | 2       |
| TGGT1_271970  | glideosome-associated protein with multiple-membrane span    | INF         | 0               | 2       |

|               |                                                             |     |   |    |
|---------------|-------------------------------------------------------------|-----|---|----|
| TGGT1_285250  | hypothetical protein                                        | INF | 0 | 2  |
| TGGT1_286160B | non-specific serine/threonine protein kinase                | INF | 0 | 2  |
| TGGT1_286240  | putative kelch repeat protein                               | INF | 0 | 2  |
| TGGT1_292120  | membrane occupation and recognition nexus protein MORN2     | INF | 0 | 2  |
| TGGT1_297130  | hypothetical protein                                        | INF | 0 | 2  |
| TGGT1_299810  | cysteine-tRNA synthetase (CysRS)                            | INF | 0 | 2  |
| TGGT1_306210  | RNA polymerase II accessory factor CDC73                    | INF | 0 | 2  |
| TGGT1_307570  | putative glycerol-3-phosphate dehydrogenase (gpdh)          | INF | 0 | 2  |
| TGGT1_308810B | rhoptry neck protein RON9                                   | INF | 0 | 2  |
| TGGT1_310060  | small nuclease                                              | INF | 0 | 2  |
| TGGT1_310360  | hypothetical protein                                        | INF | 0 | 2  |
| TGGT1_310440  | membrane occupation and recognition nexus protein MORN1     | INF | 0 | 2  |
| TGGT1_311030  | hypothetical protein                                        | INF | 0 | 2  |
| TGGT1_313240  | putative ethylene-responsive RNA helicase                   | INF | 0 | 2  |
| TGGT1_314400  | putative pyruvate dehydrogenase E1 component, beta subunit  | 10  | 1 | 10 |
| TGGT1_219860  | putative replication licensing factor                       | 9   | 1 | 9  |
| TGGT1_227560  | putative IWS1 transcription factor                          | 9   | 1 | 9  |
| TGGT1_253940  | CAM Kinase family, incomplete catalytic triad               | 9   | 1 | 9  |
| TGGT1_305510  | hypothetical protein                                        | 9   | 1 | 9  |
| TGGT1_311625  | WD domain, G-beta repeat-containing protein                 | 9   | 1 | 9  |
| TGGT1_308860  | hypothetical protein                                        | 7   | 1 | 7  |
| TGGT1_211690  | AAA family protein                                          | 6   | 1 | 6  |
| TGGT1_227948  | peptidase M16 inactive domain-containing protein            | 6   | 1 | 6  |
| TGGT1_231210  | sarcalumenin/eps15 family protein                           | 6   | 1 | 6  |
| TGGT1_202530  | aspartate-tRNA ligase                                       | 5   | 1 | 5  |
| TGGT1_205010  | putative U2 small nuclear ribonucleoprotein family protein  | 5   | 1 | 5  |
| TGGT1_253900  | parasite porphobilinogen synthase PBGS                      | 5   | 1 | 5  |
| TGGT1_260630  | DnaJ family Sec63 protein                                   | 5   | 1 | 5  |
| TGGT1_277910  | thrombospondin type 1 domain-containing protein             | 5   | 1 | 5  |
| TGGT1_320210  | WD domain, G-beta repeat domain containing protein          | 5   | 1 | 5  |
| TGGT1_271050  | SAG-related sequence SRS34A (SAG2A)                         | 4   | 3 | 12 |
| TGGT1_212090  | hypothetical protein                                        | 4   | 2 | 8  |
| TGGT1_206610  | pyruvate dehydrogenase complex subunit PDH-E2               | 4   | 1 | 4  |
| TGGT1_214210  | rRNA pseudouridine synthase                                 | 4   | 1 | 4  |
| TGGT1_218240  | hypothetical protein                                        | 4   | 1 | 4  |
| TGGT1_225125  | pre-rRNA processing protein                                 | 4   | 1 | 4  |
| TGGT1_240850  | WD domain, G-beta repeat-containing protein                 | 4   | 1 | 4  |
| TGGT1_245670  | pyruvate dehydrogenase complex subunit PDH-E1Alpha          | 4   | 1 | 4  |
| TGGT1_272290  | pyruvate dehydrogenase complex subunit PD-HE1Beta           | 4   | 1 | 4  |
| TGGT1_298610  | GYF domain-containing protein                               | 4   | 1 | 4  |
| TGGT1_309740  | LSM domain-containing protein                               | 4   | 1 | 4  |
| TGGT1_314410  | putative aquarius                                           | 4   | 1 | 4  |
| TGGT1_315690  | DnaJ domain-containing protein                              | 4   | 1 | 4  |
| TGGT1_243960  | nuclear transport factor 2 (ntf2) domain-containing protein | 3.5 | 2 | 7  |
| TGGT1_251790  | hypothetical protein                                        | 3.5 | 2 | 7  |
| TGGT1_270550  | putative gamma-glutamyl phosphate reductase                 | 3.5 | 2 | 7  |
| TGGT1_222220  | alveolin domain containing intermediate filament IMC7       | 3   | 4 | 12 |
| TGGT1_212250  | XPG N-terminal domain-containing protein                    | 3   | 2 | 6  |
| TGGT1_226050  | hypothetical protein                                        | 3   | 2 | 6  |
| TGGT1_233110  | IMP dehydrogenase (IMPDH)                                   | 3   | 2 | 6  |
| TGGT1_261440  | ARM repeats containing protein                              | 3   | 2 | 6  |
| TGGT1_297470  | putative myosin light chain 2                               | 3   | 2 | 6  |
| TGGT1_202610  | protein phosphatase 2C domain-containing protein            | 3   | 1 | 3  |
| TGGT1_204490  | hypothetical protein                                        | 3   | 1 | 3  |
| TGGT1_229930  | p25-alpha family protein                                    | 3   | 1 | 3  |
| TGGT1_230350  | hypothetical protein                                        | 3   | 1 | 3  |

|              |                                                               |   |   |   |
|--------------|---------------------------------------------------------------|---|---|---|
| TGGT1_231130 | hypothetical protein                                          | 3 | 1 | 3 |
| TGGT1_232830 | putative vacuolar proton translocating ATPase subunit A       | 3 | 1 | 3 |
| TGGT1_244150 | glycerate kinase                                              | 3 | 1 | 3 |
| TGGT1_252630 | hypothetical protein                                          | 3 | 1 | 3 |
| TGGT1_253730 | importin-beta N-terminal domain-containing protein            | 3 | 1 | 3 |
| TGGT1_254390 | CRAL/TRIO domain-containing protein                           | 3 | 1 | 3 |
| TGGT1_257490 | prefoldin subunit superfamily protein                         | 3 | 1 | 3 |
| TGGT1_266970 | hypothetical protein                                          | 3 | 1 | 3 |
| TGGT1_268950 | hypothetical protein                                          | 3 | 1 | 3 |
| TGGT1_269650 | FFD and TFG box motifs protein                                | 3 | 1 | 3 |
| TGGT1_277760 | putative adenylosuccinate lyase                               | 3 | 1 | 3 |
| TGGT1_285850 | peptidyl-prolyl cis-trans isomerase, FKBP-type domain-contain | 3 | 1 | 3 |
| TGGT1_288350 | hypothetical protein                                          | 3 | 1 | 3 |
| TGGT1_289600 | heat shock protein HSP29                                      | 3 | 1 | 3 |
| TGGT1_300120 | aminotransferase, class V superfamily protein                 | 3 | 1 | 3 |
| TGGT1_305980 | pyruvate dehydrogenase complex subunit PDH-E3l                | 3 | 1 | 3 |
| TGGT1_306330 | phospholipase                                                 | 3 | 1 | 3 |
| TGGT1_309265 | oxidoreductase, short chain dehydrogenase/reductase family p  | 3 | 1 | 3 |
| TGGT1_310760 | protein phosphatase 2C domain-containing protein              | 3 | 1 | 3 |
| TGGT1_311360 | protein kinase G AGC kinase family member PKG                 | 3 | 1 | 3 |
| TGGT1_311480 | hypothetical protein                                          | 3 | 1 | 3 |
| TGGT1_313640 | hypothetical protein                                          | 3 | 1 | 3 |
| TGGT1_314080 | hypothetical protein                                          | 3 | 1 | 3 |
| TGGT1_316900 | Sas10 C-terminal domain-containing protein                    | 3 | 1 | 3 |
