# Supplementary material for: The Tyrosine Phosphatase PRL Regulates Attachment of Toxoplasma gondii to Host Cells and Is Essential for Virulence
Source: PubMed Central journal article supplement (PMC9241511; doi:10.1128/msphere.00052-22), 2022-05-23
Supplement: msphere.00052-22-sf002.pdf [file msphere.00052-22-sf002.pdf]

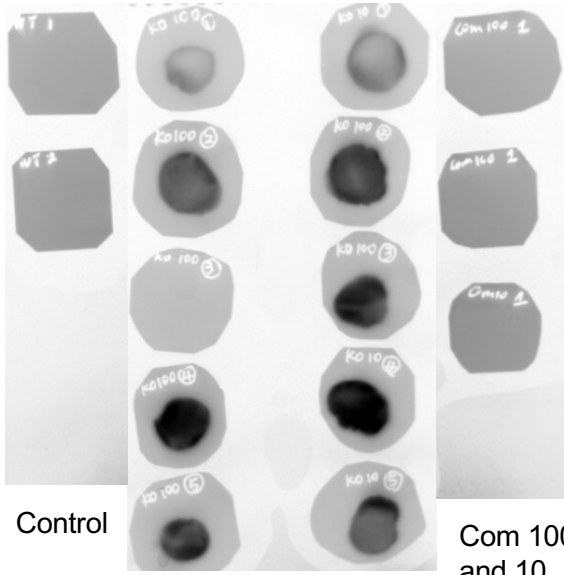

Control

KO 100

KO 10

Com 100  
and 10
