# Supplementary material for: The Tyrosine Phosphatase PRL Regulates Attachment of Toxoplasma gondii to Host Cells and Is Essential for Virulence
Source: PubMed Central journal article supplement (PMC9241511; doi:10.1128/msphere.00052-22), 2022-05-23
Supplement: msphere.00052-22-st001.pdf [file msphere.00052-22-st001.pdf]

| Purpose                                                                               | Name              | Sequence                                                                |
|---------------------------------------------------------------------------------------|-------------------|-------------------------------------------------------------------------|
| Amplify the promoter of TgPRL gene                                                    | prl.pr.F1         | GCGAATTGGGTACCGGGCCCTTTAGTGACGCCAGAAA<br>CGTAAG                         |
|                                                                                       | prl.pr.R1         | TACGGGTACATCTTTCTAGCGAAAAAGTGAG                                         |
| Amplify the CDS of TgPRL gene with an HA tag in the N-terminal                        | prl.cds.F1        | AAAGATGTACCCGTACGACGTCCCGGACTACGCTAAC<br>GAAGCGTCGTCCTGC                |
|                                                                                       | prl.cds.R1        | TttatctagacttaagTCACATGATTGCGCATCTACCTCCG                               |
| Generate pSag1-Cas9-U6-sgPRL by using Q5 mutagenesis                                  | prl.ko.sgRNA.F1   | gtgtagactgGTTTTAGAGCTAGAAATAGC                                          |
|                                                                                       | prl.ko.sgRNA.R1   | tgctccctcAACTTGACATCCCCATTTAC                                           |
| Amplify the DHFR selection cassette from the plasmid pJET-DHFR                        | prl.ko.hr.dhfr.F1 | GTTGGGCCACAGCCCGACGACCAGCCACTCGGAACT<br>GACCAGCGACTCACTATAGGGAGAGCGGC   |
|                                                                                       | prl.ko.hr.dhfr.R1 | CGCTCCTCTTCTCCTCTGTCTTCTTCTTCGTTTCCTCCG<br>CGGCAAGAACATCGATTTTCCATGGCAG |
| Test $\Delta$ prl shown in Figure 2                                                   | P1.F              | TTTTGACGCGTCTCTGTAGGTA                                                  |
|                                                                                       | P1.R              | atgtggcatttcacacagtctc                                                  |
|                                                                                       | P2.F              | gaggagagacggaaagtgctta                                                  |
|                                                                                       | P2.R              | AATCTGGCTGTCTAAAGCCTTG                                                  |
| Generate pSag1-Cas9-U6-sgKU80 by using Q5 mutagenesis                                 | sgKU80.F1         | ctcatattccGTTTTAGAGCTAGAAATAGC                                          |
|                                                                                       | sgKU80.R1         | aaaggtgtacAACTTGACATCCCCATTTAC                                          |
| Amplify the HA-PRL expression cassette with short homology to the 5' UTR of ku80 gene | PRL.ku80.EE.HR.F2 | GTCCCCGGTTTCGCCTCAGCACACACACACATGACGTA<br>CATCGcgcggctatttagttaagggagc  |
|                                                                                       | PRL.ku80.EE.HR.R1 | GTAATGTCCGGAATAGTTCCCATCAGAAACAATGGAGCT<br>ATCCCAAAGCTGGAGCTCGTACC      |

|                                                                         |                            |                                                                                                                                                                                                                                                                                                                                                                                                                                                                                                                                                                                                                                                                                                                                                                                                                                                                                                                                                                                                                                                                                                                                      |
|-------------------------------------------------------------------------|----------------------------|--------------------------------------------------------------------------------------------------------------------------------------------------------------------------------------------------------------------------------------------------------------------------------------------------------------------------------------------------------------------------------------------------------------------------------------------------------------------------------------------------------------------------------------------------------------------------------------------------------------------------------------------------------------------------------------------------------------------------------------------------------------------------------------------------------------------------------------------------------------------------------------------------------------------------------------------------------------------------------------------------------------------------------------------------------------------------------------------------------------------------------------|
| <p>Artificially synthesized fragment for generation of C339S mutant</p> | <p>C339S-synthesis-DNA</p> | <p>GTGTAGACTGCGGCCGCGCGGAGGAAACGAAGAGA<br/> AGACAGAGGAGAAGAGGAGCGAGAAGGCTGGGGCCG<br/> AGCGCGAGTGCGAGAGGAAGACGCAGCGACCTCGAT<br/> TTGACGGCGACGGTTCTTCTCTCAGCCCGCGAAGCAA<br/> CGCGTCCC GCGGCAGCGCGTGCAGCACACGGAGCTG<br/> CGAAAGCCACGAGAAGGTTGGCCGCACGTTGAGTGG<br/> AGACTCGACGGGCAGAGACGGCGTCTGTTCTGTCTCT<br/> TCTGCTCGCCAGCCTTCTCTCAGGAGAAAAAGCGCCG<br/> CTGAGGAAGTGGGACGCGAGGTGAAGGTGCACGGCA<br/> AGGCTTTAGACAGCCAGATTGAACTTGTGCGGACGAA<br/> GAACAGGGGCAAGAGCGAGGTGACCCGACTGGGTCG<br/> CGGGGCGGGGAGTGATGCGCGGTGTCAGTGTGCGCC<br/> TCTCGGGACTGCGCGTCACGTTCTTCCGGGCGCCAA<br/> CCGAGTCAAAGGCGCCAGAGCGCGAAGCCTCTGACG<br/> AAGCTCAGTTCGTCGTCCTCCAGCCACAACAAGACAA<br/> CGATGGTGCCGACTGTGATGAACACGCCGACCCGCAT<br/> CGAGGCGGGGCGTCAGAAGTTTCTGATTTTCGACGCG<br/> CCTAGCCAGGAGAATCTTCCC GCGTACATCGAGGAAA<br/> TGC GCGCCTACGAGGTCACAGACTTGGTGC GAACCTG<br/> CGAGCGGACCTACGACGACAAGACCGTGCTGGCTTCC<br/> GGCATCCGCCCCACGAACTGATCTTCCCGATGGAG<br/> AGGCGCCTCCAGACGATGTCATCGACGAGTGGCTCAC<br/> GCTCTGCAACGCCGTCTCGCAGCAGAGGGGGCGCAAT<br/> CGCGATTCACAGCGTCGCTGGTTTAGGTGCGGCCCCG<br/> GTCCTCGTCGCCATCGCCCTCATCGAAAAGGGCATGG<br/> ACCCCATGGATGCCATCAT</p> |
| <p>Artificially synthesized fragment for generation of C401A mutant</p> | <p>C401A-synthesis-DNA</p> | <p>GGCATGGACCCCATGGATGCCATCATGTTCAATTCGAG<br/> AAAGAAGAAAGGGCGCCATCAACCGA</p>                                                                                                                                                                                                                                                                                                                                                                                                                                                                                                                                                                                                                                                                                                                                                                                                                                                                                                                                                                                                                                                        |
